# Supplementary material
Source: PubMed Central journal article supplement (PMC556287)

**A**

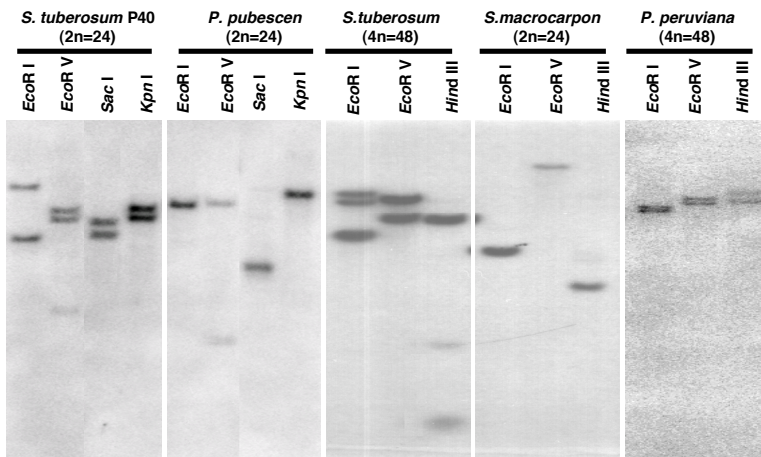

**B**

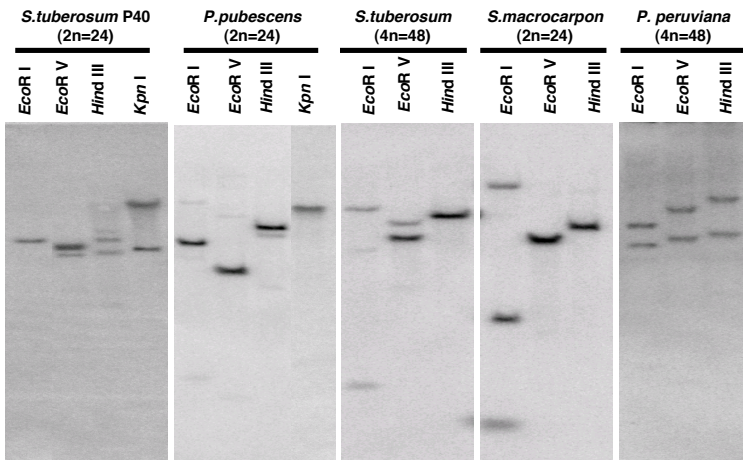

Supplement: pnas_102_16_5779__2.pdf [file pnas_102_16_5779__2.pdf]

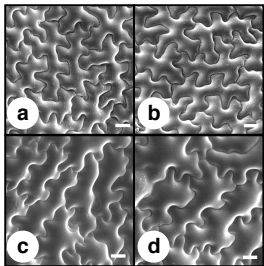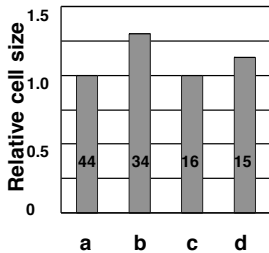

Supplement: pnas_102_16_5779__3.pdf [file pnas_102_16_5779__3.pdf]
